# Supplementary material
Source: PubMed Central journal article supplement (PMC7724354)
Supplement: ajtr0012-7475-f10.pdf [file ajtr0012-7475-f10.pdf]

## Autophagy prognostic model in patients with renal cancer

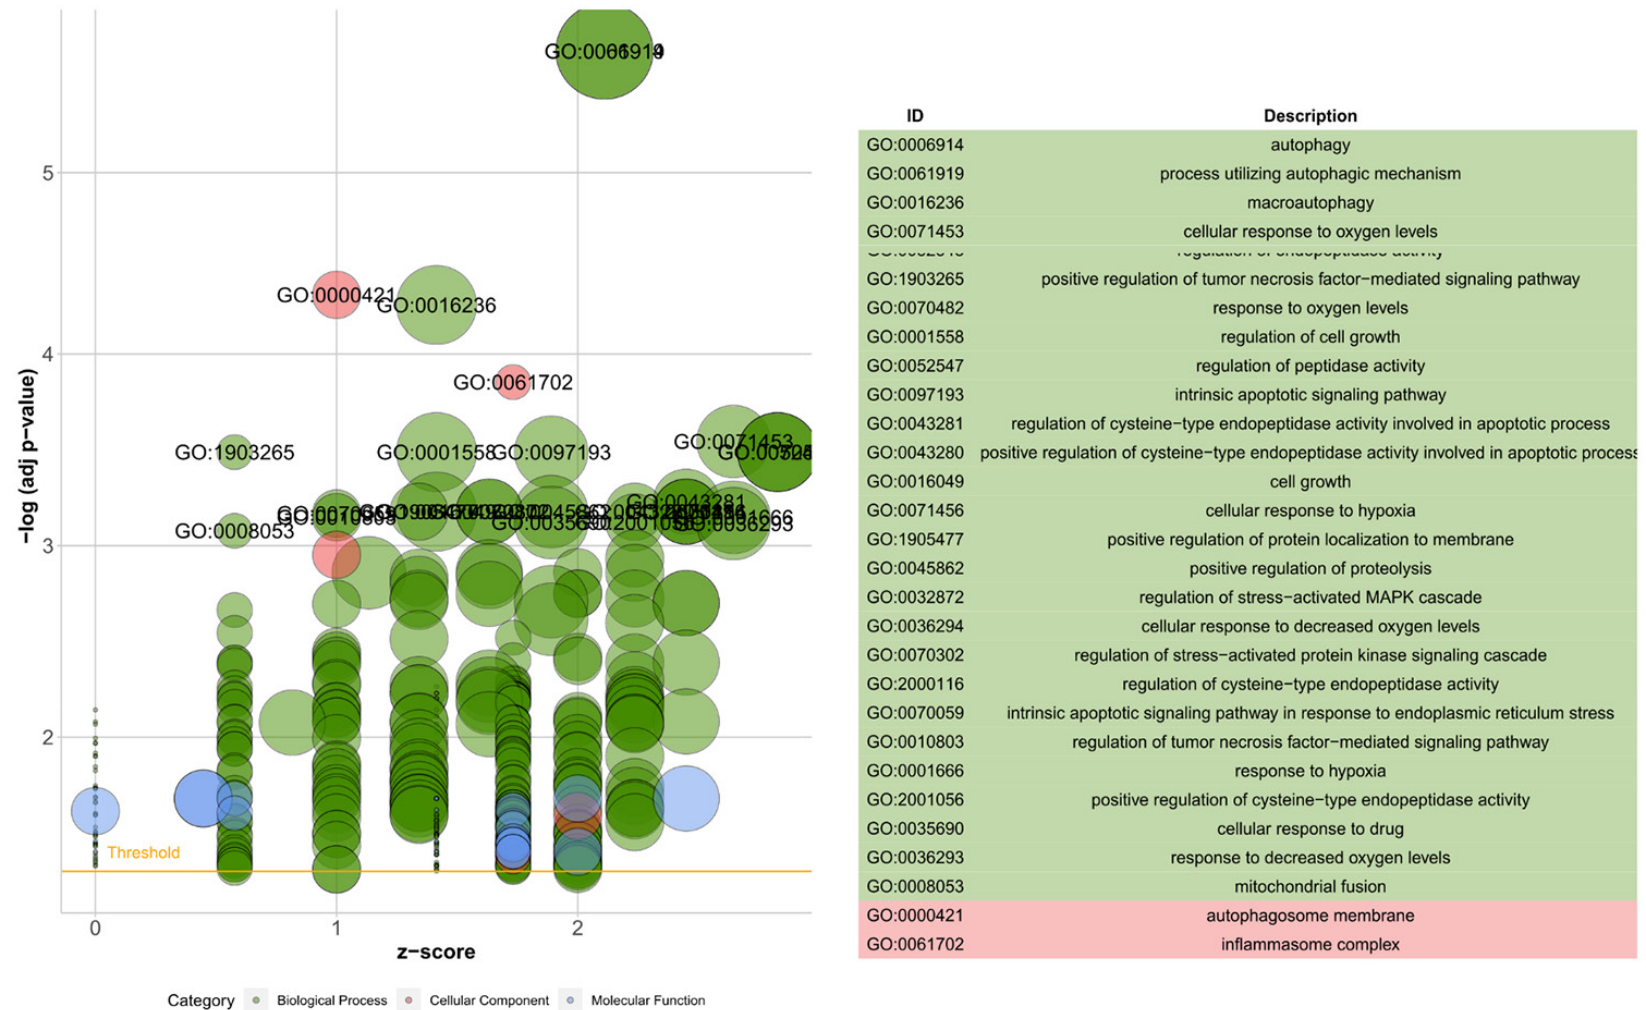

**Supplementary Figure 1.** Bubble plot of Gene Ontology (GO) enrichment analysis for differentially expressed autophagy-related genes in renal cancer. The green circles show biological process terms, red circles indicate the cellular component terms, and the blue circles represent molecular function terms.

## Autophagy prognostic model in patients with renal cancer

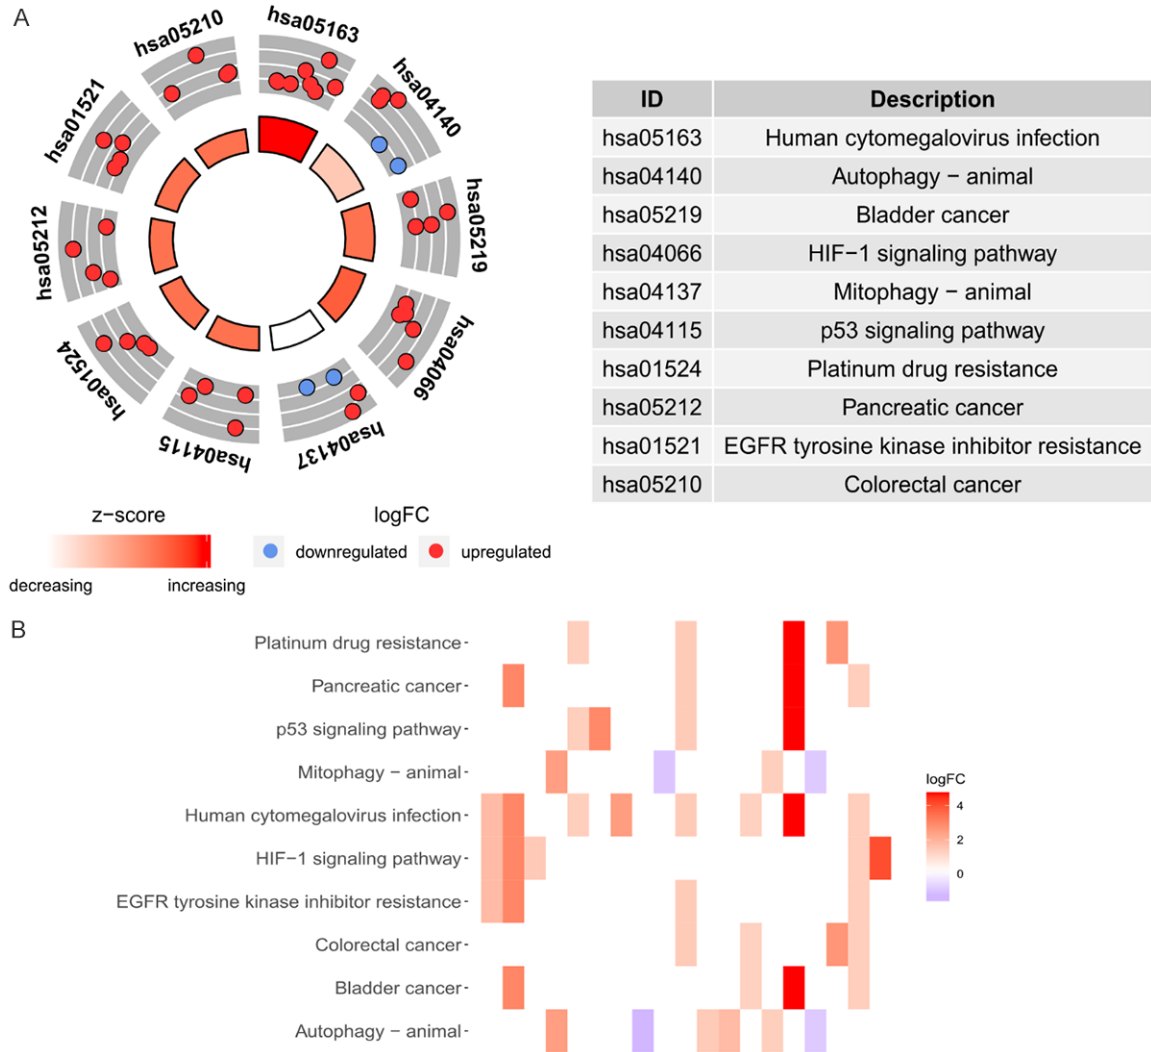

**Supplementary Figure 2.** Kyoto Encyclopedia of Genes and Genomes (KEGG) analysis of differentially expressed autophagy-related genes. A. A scatter plot for each term of the log fold change (FC) of the assigned genes was shown with the outer circle. The red circles indicate upregulation and the blue circles indicate downregulation. B. Heatmap of the KEGG pathway enrichment results. The color of each module depends on its corresponding logFC values.

## Autophagy prognostic model in patients with renal cancer

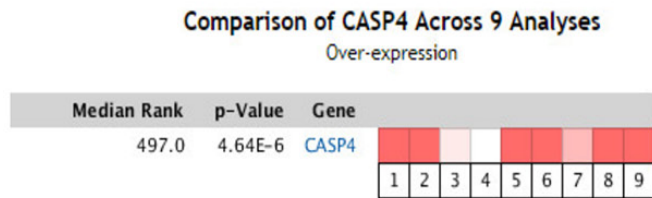

#### Legend

- |                                                                                                                                                                                                                                                                                                                                                                                                                                                                                                                                                                                     |                                                                                                                                                                                                                                                                                                                                                                                                                                                      |
|-------------------------------------------------------------------------------------------------------------------------------------------------------------------------------------------------------------------------------------------------------------------------------------------------------------------------------------------------------------------------------------------------------------------------------------------------------------------------------------------------------------------------------------------------------------------------------------|------------------------------------------------------------------------------------------------------------------------------------------------------------------------------------------------------------------------------------------------------------------------------------------------------------------------------------------------------------------------------------------------------------------------------------------------------|
| <ol style="list-style-type: none"> <li>1. Hereditary Clear Cell Renal Cell Carcinoma vs. Normal<br/><i>Beroukhim Renal, Cancer Res, 2009</i></li> <li>2. Non-Hereditary Clear Cell Renal Cell Carcinoma vs. Normal<br/><i>Beroukhim Renal, Cancer Res, 2009</i></li> <li>3. Clear Cell Sarcoma of the Kidney vs. Normal<br/><i>Cutcliffe Renal, Clin Cancer Res, 2005</i></li> <li>4. Renal Wilms Tumor vs. Normal<br/><i>Cutcliffe Renal, Clin Cancer Res, 2005</i></li> <li>5. Clear Cell Renal Cell Carcinoma vs. Normal<br/><i>Gumz Renal, Clin Cancer Res, 2007</i></li> </ol> | <ol style="list-style-type: none"> <li>6. Renal Pelvis Urothelial Carcinoma vs. Normal<br/><i>Jones Renal, Clin Cancer Res, 2005</i></li> <li>7. Clear Cell Renal Cell Carcinoma vs. Normal<br/><i>Lenburg Renal, BMC Cancer, 2003</i></li> <li>8. Clear Cell Renal Cell Carcinoma vs. Normal<br/><i>Yusenko Renal, BMC Cancer, 2009</i></li> <li>9. Papillary Renal Cell Carcinoma vs. Normal<br/><i>Yusenko Renal, BMC Cancer, 2009</i></li> </ol> |
|-------------------------------------------------------------------------------------------------------------------------------------------------------------------------------------------------------------------------------------------------------------------------------------------------------------------------------------------------------------------------------------------------------------------------------------------------------------------------------------------------------------------------------------------------------------------------------------|------------------------------------------------------------------------------------------------------------------------------------------------------------------------------------------------------------------------------------------------------------------------------------------------------------------------------------------------------------------------------------------------------------------------------------------------------|

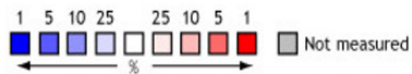

The rank for a gene is the median rank for that gene across each of the analyses.  
The p-Value for a gene is its p-Value for the median-ranked analysis.

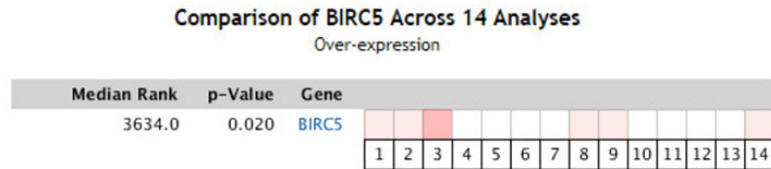

#### Legend

- |                                                                                                                                                                                                                                                                                                                                                                                                                                                                                                                                                                                                                                                                                                                                                                                     |                                                                                                                                                                                                                                                                                                                                                                                                                                                                                                                                                                                                                                                                                                                                     |
|-------------------------------------------------------------------------------------------------------------------------------------------------------------------------------------------------------------------------------------------------------------------------------------------------------------------------------------------------------------------------------------------------------------------------------------------------------------------------------------------------------------------------------------------------------------------------------------------------------------------------------------------------------------------------------------------------------------------------------------------------------------------------------------|-------------------------------------------------------------------------------------------------------------------------------------------------------------------------------------------------------------------------------------------------------------------------------------------------------------------------------------------------------------------------------------------------------------------------------------------------------------------------------------------------------------------------------------------------------------------------------------------------------------------------------------------------------------------------------------------------------------------------------------|
| <ol style="list-style-type: none"> <li>1. Hereditary Clear Cell Renal Cell Carcinoma vs. Normal<br/><i>Beroukhim Renal, Cancer Res, 2009</i></li> <li>2. Non-Hereditary Clear Cell Renal Cell Carcinoma vs. Normal<br/><i>Beroukhim Renal, Cancer Res, 2009</i></li> <li>3. Clear Cell Renal Cell Carcinoma vs. Normal<br/><i>Gumz Renal, Clin Cancer Res, 2007</i></li> <li>4. Chromophobe Renal Cell Carcinoma vs. Normal<br/><i>Jones Renal, Clin Cancer Res, 2005</i></li> <li>5. Clear Cell Renal Cell Carcinoma vs. Normal<br/><i>Jones Renal, Clin Cancer Res, 2005</i></li> <li>6. Papillary Renal Cell Carcinoma vs. Normal<br/><i>Jones Renal, Clin Cancer Res, 2005</i></li> <li>7. Renal Oncocytoma vs. Normal<br/><i>Jones Renal, Clin Cancer Res, 2005</i></li> </ol> | <ol style="list-style-type: none"> <li>8. Renal Pelvis Urothelial Carcinoma vs. Normal<br/><i>Jones Renal, Clin Cancer Res, 2005</i></li> <li>9. Clear Cell Renal Cell Carcinoma vs. Normal<br/><i>Lenburg Renal, BMC Cancer, 2003</i></li> <li>10. Chromophobe Renal Cell Carcinoma vs. Normal<br/><i>Yusenko Renal, BMC Cancer, 2009</i></li> <li>11. Clear Cell Renal Cell Carcinoma vs. Normal<br/><i>Yusenko Renal, BMC Cancer, 2009</i></li> <li>12. Papillary Renal Cell Carcinoma vs. Normal<br/><i>Yusenko Renal, BMC Cancer, 2009</i></li> <li>13. Renal Oncocytoma vs. Normal<br/><i>Yusenko Renal, BMC Cancer, 2009</i></li> <li>14. Renal Wilms Tumor vs. Normal<br/><i>Yusenko Renal, BMC Cancer, 2009</i></li> </ol> |
|-------------------------------------------------------------------------------------------------------------------------------------------------------------------------------------------------------------------------------------------------------------------------------------------------------------------------------------------------------------------------------------------------------------------------------------------------------------------------------------------------------------------------------------------------------------------------------------------------------------------------------------------------------------------------------------------------------------------------------------------------------------------------------------|-------------------------------------------------------------------------------------------------------------------------------------------------------------------------------------------------------------------------------------------------------------------------------------------------------------------------------------------------------------------------------------------------------------------------------------------------------------------------------------------------------------------------------------------------------------------------------------------------------------------------------------------------------------------------------------------------------------------------------------|

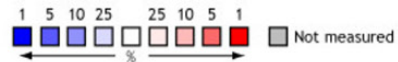

The rank for a gene is the median rank for that gene across each of the analyses.  
The p-Value for a gene is its p-Value for the median-ranked analysis.

**Supplementary Figure 3.** Search of the Oncomine database demonstrating that the expression levels of *CASP4* and *BIRC5* mRNA in RC tissues were significantly higher than those in normal tissues.
